# Supplementary material for: Comparative physiological, biochemical, and molecular thermal stress response profiles for two Unionid freshwater mussel species
Source: Oxford University Press journal article supplement (doi:10.1242/jeb.140129), 2016-01-01
Supplement: jeb140129supp.pdf [file jeb140129supp.pdf]

**Table S1. Two-way ANOVA results for gene expression following acute heat shock and recovery.**

|                | Variables      | <i>df</i> | <i>F</i> | <i>P</i> |
|----------------|----------------|-----------|----------|----------|
| <i>HSP90</i>   | Species        | 1         | 15.64    | 0.0011*  |
|                | Time           | 3         | 44.61    | <.0001*  |
|                | Species X Time | 3         | 1.11     | 0.3739   |
|                | Error          | 16        |          |          |
| <i>HSP70-1</i> | Species        | 1         | 9.50     | 0.0071*  |
|                | Time           | 3         | 18.72    | <.0001*  |
|                | Species X Time | 3         | 2.33     | 0.1131   |
|                | Error          | 16        |          |          |
| <i>HSP70-2</i> | Species        | 1         | 1.41     | 0.2532   |
|                | Time           | 3         | 11.93    | 0.0002*  |
|                | Species X Time | 3         | 1.91     | 0.1690   |
|                | Error          | 16        |          |          |

2-way ANOVA Analysis of Variance

\* Significant at  $P < 0.05$

**Table S2. Two-way ANOVA results for physiological and biochemical parameters tested during chronic warming challenge.**

| Factor       | Variables | <i>df</i> | <i>F</i> | <i>P</i> |
|--------------|-----------|-----------|----------|----------|
| Condition    | Species   | 1         | 3.89     | 0.0520   |
|              | Time      | 7         | 9.49     | <.0001*  |
|              | Species X | 7         | 2.84     | 0.0107*  |
|              | Error     | 80        |          |          |
| TGR          | Species   | 1         | 0.45     | 0.5046   |
|              | Time      | 7         | 17.08    | <.0001*  |
|              | Species X | 7         | 12.00    | <.0001*  |
|              | Error     | 80        |          |          |
| SGR          | Species   | 1         | 0.00     | 0.9848   |
|              | Time      | 7         | 3.07     | 0.0064*  |
|              | Species X | 7         | 5.12     | <.0001*  |
|              | Error     | 80        |          |          |
| Glycogen     | Species   | 1         | 8.67     | 0.0042*  |
|              | Time      | 7         | 1.36     | 0.2338   |
|              | Species X | 7         | 3.38     | 0.0033*  |
|              | Error     | 80        |          |          |
| Triglyceride | Species   | 1         | 4.62     | 0.0345*  |
|              | Time      | 7         | 9.50     | <.0001*  |
|              | Species X | 7         | 5.04     | <.0001*  |
|              | Error     | 80        |          |          |

2-way ANOVA Analysis of Variance

\* Significant at  $P < 0.05$

**Table S3. Two-way ANOVA results for all genes tested during chronic warming challenge.**

| Factor       | Variables      | <i>df</i> | <i>F</i> | <i>P</i> |
|--------------|----------------|-----------|----------|----------|
| <i>HSP90</i> | Species        | 1         | 15.00    | 0.0002*  |
|              | Time           | 7         | 28.71    | <.0001*  |
|              | Species X Time | 7         | 42.64    | <.0001*  |
|              | Error          | 80        |          |          |
| <i>HSP70</i> | Species        | 1         | 30.65    | <.0001*  |
|              | Time           | 7         | 18.83    | <.0001*  |
|              | Species X Time | 7         | 8.71     | <.0001*  |
|              | Error          | 80        |          |          |
| <i>HSP60</i> | Species        | 1         | 3.17     | 0.0787   |
|              | Time           | 7         | 22.76    | <.0001*  |
|              | Species X Time | 7         | 18.00    | <.0001*  |
|              | Error          | 80        |          |          |
| <i>PFK</i>   | Species        | 1         | 0.66     | 0.4207   |
|              | Time           | 7         | 12.65    | <.0001*  |
|              | Species X Time | 7         | 3.27     | 0.0042*  |
|              | Error          | 80        |          |          |

2-way ANOVA Analysis of Variance

\* Significant at  $P < 0.05$

**Table S4. Mixed model ANCOVA LSMEANS results for the overall data from the chronic field pond temperature challenge.**

| Factor              | Comparison        | Estimate | Std. Error | df   | t-value | Adjusted P |
|---------------------|-------------------|----------|------------|------|---------|------------|
| Condition           | VL-VN Ambient     | 0.5542   | 0.4914     | 48.7 | 1.1300  | 0.6743     |
|                     | VL-VN Warmed      | -0.5850  | 0.4914     | 48.7 | -1.1900 | 0.6358     |
|                     | VL Ambient-Warmed | 0.2109   | 0.4973     | 32.9 | 0.4200  | 0.9741     |
|                     | VN Ambient-Warmed | -0.9283  | 0.4973     | 32.9 | -1.8700 | 0.2558     |
| TGR                 | VL-VN Ambient     | 0.0031   | 0.0010     | 20.0 | 3.1300  | 0.0249*    |
|                     | VL-VN Warmed      | 0.0020   | 0.0010     | 20.0 | 2.0700  | 0.1965     |
|                     | VL Ambient-Warmed | 0.0007   | 0.0010     | 20.0 | 0.7500  | 0.8740     |
|                     | VN Ambient-Warmed | -0.0003  | 0.0010     | 20.0 | -0.3100 | 0.9897     |
| SGR                 | VL-VN Ambient     | 0.0035   | 0.0007     | 48.9 | 5.1300  | <0.0001*   |
|                     | VL-VN Warmed      | 0.0031   | 0.0007     | 48.9 | 4.5200  | 0.0002*    |
|                     | VL Ambient-Warmed | 0.0013   | 0.0009     | 18.8 | 1.4200  | 0.4943     |
|                     | VN Ambient-Warmed | 0.0009   | 0.0009     | 18.8 | 0.9600  | 0.7712     |
| Glycogen            | VL-VN Ambient     | -0.0022  | 0.0045     | 20.0 | -0.5000 | 0.9592     |
|                     | VL-VN Warmed      | 0.0099   | 0.0045     | 20.0 | 2.1900  | 0.1607     |
|                     | VL Ambient-Warmed | -0.0112  | 0.0045     | 20.0 | -2.4800 | 0.0949*    |
|                     | VN Ambient-Warmed | 0.0009   | 0.0045     | 20.0 | 0.2100  | 0.9967     |
| log(Triglycerides)  | VL-VN Ambient     | 0.7625   | 0.1754     | 20.0 | 4.3500  | 0.0016*    |
|                     | VL-VN Warmed      | 0.4179   | 0.1754     | 20.0 | 2.3800  | 0.1131     |
|                     | VL Ambient-Warmed | 0.0687   | 0.1754     | 20.0 | 4.3500  | 0.0016*    |
|                     | VN Ambient-Warmed | -0.2759  | 0.1754     | 20.0 | -1.5700 | 0.4157     |
| log( <i>hsp90</i> ) | VL-VN Ambient     | 0.9703   | 0.0783     | 55.3 | 12.3900 | <0.0001*   |
|                     | VL-VN Warmed      | 1.3242   | 0.0783     | 55.3 | 16.9100 | <0.0001*   |
|                     | VL Ambient-Warmed | -0.0456  | 0.0783     | 55.3 | -0.5800 | 0.9368     |
|                     | VN Ambient-Warmed | 0.3083   | 0.0783     | 55.3 | 3.9400  | 0.0013*    |
| log( <i>hsp70</i> ) | VL-VN Ambient     | 0.1472   | 0.1695     | 62.2 | 0.8700  | 0.8210     |
|                     | VL-VN Warmed      | 1.3856   | 0.1695     | 62.2 | 8.1700  | <0.0001*   |
|                     | VL Ambient-Warmed | -0.4115  | 0.1695     | 62.2 | -2.4300 | 0.0823*    |
|                     | VN Ambient-Warmed | 0.8269   | 0.1695     | 62.2 | 4.8800  | <0.0001*   |
| log( <i>hsp60</i> ) | VL-VN Ambient     | 0.6755   | 0.7870     | 54.8 | 8.5800  | <0.0001*   |
|                     | VL-VN Warmed      | -0.0808  | 0.7870     | 54.8 | -1.0300 | 0.7345     |
|                     | VL Ambient-Warmed | 0.2410   | 0.7870     | 54.8 | 3.0600  | 0.0174*    |
|                     | VN Ambient-Warmed | -0.5153  | 0.7870     | 54.8 | -6.5500 | <0.0001*   |
| log( <i>pfk</i> )   | VL-VN Ambient     | 0.4417   | 0.1215     | 63.4 | 3.6400  | 0.0030*    |
|                     | VL-VN Warmed      | 0.4550   | 0.1215     | 63.4 | 3.7500  | 0.0022*    |
|                     | VL Ambient-Warmed | 0.1465   | 0.1215     | 63.4 | 1.2100  | 0.6250     |
|                     | VN Ambient-Warmed | 0.1599   | 0.1215     | 63.4 | 1.3200  | 0.5563     |

Mixed Model Analysis of Covariance – Overall LSMEANS

\* Significant at  $P < 0.1$

**Table S5. Mixed model ANCOVA LSMEANS results for the heat shocked data from the chronic field pond temperature challenge.**

| Factor              | Comparison        | Estimate | Std. Error | df   | t-value | Adjusted P |
|---------------------|-------------------|----------|------------|------|---------|------------|
| Condition           | VL-VN Ambient     | 1.2347   | 0.5538     | 27.3 | 2.2300  | 0.1406     |
|                     | VL-VN Warmed      | -0.1092  | 0.5538     | 27.3 | -0.2000 | 0.9972     |
|                     | VL Ambient-Warmed | -0.2691  | 0.5848     | 25.5 | -0.4600 | 0.9670     |
|                     | VN Ambient-Warmed | -1.6131  | 0.5848     | 25.5 | -2.7600 | 0.0475*    |
| TGR                 | VL-VN Ambient     | 0.0056   | 0.0013     | 10.0 | 4.3000  | 0.0072*    |
|                     | VL-VN Warmed      | 0.0033   | 0.0013     | 10.0 | 2.5400  | 0.1126     |
|                     | VL Ambient-Warmed | 0.0003   | 0.0014     | 19.6 | 0.2500  | 0.9940     |
|                     | VN Ambient-Warmed | -0.0019  | 0.0014     | 19.6 | -1.3800 | 0.5402     |
| SGR                 | VL-VN Ambient     | 0.0058   | 0.0010     | 10.1 | 5.3500  | 0.0015*    |
|                     | VL-VN Warmed      | 0.0041   | 0.0010     | 10.1 | 3.7800  | 0.0157*    |
|                     | VL Ambient-Warmed | 0.0017   | 0.0013     | 18.0 | 1.3000  | 0.5815     |
|                     | VN Ambient-Warmed | 0.0000   | 0.0013     | 18.0 | 0.0300  | 1.0000     |
| Glycogen            | VL-VN Ambient     | -0.0081  | 0.0049     | 10.0 | -1.6500 | 0.3981     |
|                     | VL-VN Warmed      | 0.0118   | 0.0049     | 10.0 | 2.3900  | 0.1425     |
|                     | VL Ambient-Warmed | -0.0179  | 0.0054     | 19.4 | -3.2800 | 0.0352*    |
|                     | VN Ambient-Warmed | 0.0019   | 0.0054     | 19.4 | 0.3600  | 0.9828     |
| log(Triglycerides)  | VL-VN Ambient     | 0.8949   | 0.1839     | 19.7 | 4.8700  | 0.0005*    |
|                     | VL-VN Warmed      | 0.5860   | 0.1839     | 19.7 | -2.6800 | 0.0639*    |
|                     | VL Ambient-Warmed | -0.1839  | 0.1839     | 19.7 | -1.0000 | 0.7510     |
|                     | VN Ambient-Warmed | -0.4928  | 0.1839     | 19.7 | -2.6800 | 0.0639*    |
| log( <i>hsp90</i> ) | VL-VN Ambient     | 1.1624   | 0.0992     | 36.9 | 11.7200 | <0.0001*   |
|                     | VL-VN Warmed      | 1.9656   | 0.0992     | 36.9 | 19.8100 | <0.0001*   |
|                     | VL Ambient-Warmed | -0.2336  | 0.0992     | 36.9 | -2.3500 | <0.0001*   |
|                     | VN Ambient-Warmed | 0.5696   | 0.0992     | 36.9 | 5.7400  | <0.0001*   |
| log( <i>hsp70</i> ) | VL-VN Ambient     | -0.7011  | 0.1853     | 20.0 | -3.7800 | 0.0059*    |
|                     | VL-VN Warmed      | 0.8527   | 0.1853     | 20.0 | 4.6000  | 0.0009*    |
|                     | VL Ambient-Warmed | -0.6008  | 0.1853     | 20.0 | -3.2400 | 0.0196*    |
|                     | VN Ambient-Warmed | 0.9530   | 0.1853     | 20.0 | 5.1400  | 0.0003*    |
| <i>hsp60</i>        | VL-VN Ambient     | 27.3087  | 5.4072     | 9.6  | 5.0500  | 0.0026*    |
|                     | VL-VN Warmed      | -2.7253  | 5.4072     | 9.6  | -0.5000 | 0.9562     |
|                     | VL Ambient-Warmed | 9.3776   | 5.7113     | 19.1 | 1.6400  | 0.4018     |
|                     | VN Ambient-Warmed | -20.6564 | 5.7113     | 19.1 | -3.6200 | 0.0218*    |
| <i>pfk</i>          | VL-VN Ambient     | 11.2233  | 3.8911     | 33.0 | 2.8800  | 0.0330*    |
|                     | VL-VN Warmed      | 12.9820  | 3.8911     | 33.0 | 3.3400  | 0.0108*    |
|                     | VL Ambient-Warmed | 6.0657   | 3.8911     | 33.0 | 1.5600  | 0.4153     |
|                     | VN Ambient-Warmed | 7.8245   | 3.8911     | 33.0 | 2.0100  | 0.2046     |

Mixed Model Analysis of Covariance - Heat Shocked LSMEANS

\* Significant at  $P < 0.1$

**Table S6. Mixed model ANCOVA LSMEANS results for the recovery data from the chronic field pond temperature challenge.**

| Factor              | Comparison        | Estimate | Std. Error | df   | t-value | Adjusted P |
|---------------------|-------------------|----------|------------|------|---------|------------|
| log(Condition)      | VL-VN Ambient     | -0.0439  | 0.0506     | 15.9 | -0.8700 | 0.8205     |
|                     | VL-VN Warmed      | -0.0955  | 0.0506     | 15.9 | -1.8900 | 0.2720     |
|                     | VL Ambient-Warmed | 0.0646   | 0.0525     | 26.5 | 1.2300  | 0.6173     |
|                     | VN Ambient-Warmed | -1.6131  | 0.5848     | 25.5 | -2.7600 | 0.0475*    |
| TGR                 | VL-VN Ambient     | -0.0012  | 0.0007     | 19.5 | -1.5200 | 0.4426     |
|                     | VL-VN Warmed      | -0.0001  | 0.0007     | 19.5 | -0.1800 | 0.9979     |
|                     | VL Ambient-Warmed | 0.0013   | 0.0007     | 19.5 | 1.7500  | 0.3261     |
|                     | VN Ambient-Warmed | 0.0024   | 0.0007     | 19.5 | 3.1000  | 0.0273*    |
| SGR                 | VL-VN Ambient     | 0.0058   | 0.0010     | 10.1 | 5.3500  | 0.0015*    |
|                     | VL-VN Warmed      | 0.0041   | 0.0010     | 10.1 | 3.7800  | 0.0157*    |
|                     | VL Ambient-Warmed | 0.0017   | 0.0013     | 18.0 | 1.3000  | 0.5815     |
|                     | VN Ambient-Warmed | 0.0000   | 0.0013     | 18.0 | 0.0300  | 1.0000     |
| log(Glycogen)       | VL-VN Ambient     | 0.1384   | 0.1951     | 25.9 | 0.7100  | 0.8926     |
|                     | VL-VN Warmed      | 0.0515   | 0.1951     | 25.9 | 0.2600  | 0.9934     |
|                     | VL Ambient-Warmed | 0.0025   | 0.1951     | 25.9 | 0.0100  | 1.0000     |
|                     | VN Ambient-Warmed | -0.0842  | 0.1951     | 25.9 | -0.4300 | 0.9724     |
| log(Triglycerides)  | VL-VN Ambient     | 0.5418   | 0.2999     | 19.8 | 1.8100  | 0.2997     |
|                     | VL-VN Warmed      | 0.1377   | 0.2999     | 19.8 | 0.4600  | 0.9671     |
|                     | VL Ambient-Warmed | 0.4899   | 0.2999     | 19.8 | 1.6300  | 0.3836     |
|                     | VN Ambient-Warmed | 0.0857   | 0.2999     | 19.8 | 0.2900  | 0.9916     |
| log( <i>hsp90</i> ) | VL-VN Ambient     | 0.6500   | 0.1178     | 20.7 | 5.5200  | <0.0001*   |
|                     | VL-VN Warmed      | 0.2553   | 0.1178     | 20.7 | 2.1700  | 0.1659     |
|                     | VL Ambient-Warmed | 0.2675   | 0.1178     | 20.7 | 2.2700  | 0.1378     |
|                     | VN Ambient-Warmed | -0.1273  | 0.1178     | 20.7 | -1.0800 | 0.7052     |
| log( <i>hsp70</i> ) | VL-VN Ambient     | 1.5611   | 0.3601     | 20.9 | 4.3400  | 0.0016*    |
|                     | VL-VN Warmed      | 2.2739   | 0.3601     | 20.9 | 6.3100  | <0.0001*   |
|                     | VL Ambient-Warmed | -0.0959  | 0.3601     | 20.9 | -0.2700 | 0.9932     |
|                     | VN Ambient-Warmed | 0.6168   | 0.3601     | 20.9 | 1.7100  | 0.3424     |
| <i>hsp60</i>        | VL-VN Ambient     | 4.3339   | 2.2381     | 17.3 | 1.9400  | 0.2498     |
|                     | VL-VN Warmed      | -5.4177  | 2.2381     | 17.3 | -2.4200 | 0.1101     |
|                     | VL Ambient-Warmed | 10.7496  | 2.6167     | 20.4 | 4.1100  | 0.0036*    |
|                     | VN Ambient-Warmed | 0.9980   | 2.6167     | 20.4 | 0.3800  | 0.9805     |
| log( <i>pfk</i> )   | VL-VN Ambient     | 0.5428   | 0.1408     | 22.0 | 3.8600  | 0.0044*    |
|                     | VL-VN Warmed      | 0.4151   | 0.1408     | 22.0 | 2.9500  | 0.0347*    |
|                     | VL Ambient-Warmed | -0.1041  | 0.2039     | 17.1 | -0.5100 | 0.9558     |
|                     | VN Ambient-Warmed | -0.2318  | 0.2039     | 17.1 | -1.1400 | 0.6715     |

Mixed Model Analysis of Covariance – Recovery LSMEANS

\* Significant at  $P < 0.1$
